# Supplementary material
Source: PubMed Central journal article supplement (PMC1297657)
Supplement: pnas_0503647102_2.pdf [file pnas_0503647102_2.pdf]

**Table 2. Analytical data of the compounds 3–5**

| Cp | Name                                                                                                                                                           | Structure | GP               | Analytical data                                                                                                                                                                                                                                                                                                                                                                                                                                                                                                                                                                                                                                             |
|----|----------------------------------------------------------------------------------------------------------------------------------------------------------------|-----------|------------------|-------------------------------------------------------------------------------------------------------------------------------------------------------------------------------------------------------------------------------------------------------------------------------------------------------------------------------------------------------------------------------------------------------------------------------------------------------------------------------------------------------------------------------------------------------------------------------------------------------------------------------------------------------------|
| 3  | (3 <i>E</i> ,4 <i>aS</i> ,5 <i>S</i> )-3-butylidene-4,4 <i>a</i> ,5,6,7,8-hexahydro-5-hydroxy-1,4 <i>a</i> -dimethylnaphthalene-2(3 <i>H</i> )-one             |           | 1<br>2<br>4      | <p><b>Yield:</b> 68 %</p> <p><math>[\alpha]_D^{20} = +54^\circ</math> (c = 1.07, CHCl<sub>3</sub>)</p> <p><b><sup>1</sup>H-NMR</b> (400 MHz, CDCl<sub>3</sub>): δ 0.87 (t, <i>J</i> = 6.9 Hz, 3H), 1.14 (s, 3H), 1.11-2.19 (m, 12H), 1.77 (s, 3H), 3.24-3.29 (m, 1H), 6.59 (t, <i>J</i> = 6.1 Hz, 1H).</p> <p><b><sup>13</sup>C-NMR</b> (100.6 MHz, CDCl<sub>3</sub>): δ 12.3, 14.1, 20.9, 23.0, 23.8, 27.0, 28.3, 29.4, 31.9, 41.4, 85.4, 129.1, 137.8, 152.7, 166.5, 187.4.</p> <p><b>HRMS</b> (FAB): calc. for C<sub>16</sub>H<sub>24</sub>O<sub>2</sub>: 248.1776, found: 248.1789.</p>                                                                 |
| 4  | (3 <i>E</i> ,4 <i>aS</i> ,5 <i>S</i> )-3-(4-fluoro-benzylidene)-4,4 <i>a</i> ,5,6,7,8-hexahydro-5-hydroxy-1,4 <i>a</i> -dimethylnaphthalene-2(3 <i>H</i> )-one |           | 1<br>2<br>4      | <p><b>Yield:</b> 73 %</p> <p><math>[\alpha]_D^{20} = +77^\circ</math> (c = 1.04, CHCl<sub>3</sub>)</p> <p><b><sup>1</sup>H-NMR</b> (400 MHz, CDCl<sub>3</sub>): δ 1.24 (s, 3H), 1.23-2.12 (m, 8H), 1.96 (s, 3H), 3.23 (t, <i>J</i> = 7.3 Hz, 1H), 6.91 (d, <i>J</i> = 8.4 Hz, 2H), 7.28 (d, <i>J</i> = 8.5 Hz, 2H), 7.54 (s, 1H).</p> <p><b><sup>13</sup>C-NMR</b> (100.6 MHz, CDCl<sub>3</sub>): δ 11.4, 20.7, 23.0, 26.7, 28.2, 31.6, 41.1, 85.3, 114.8 (2C), 128.1 (2C), 131.0, 131.8, 139.3, 147.4, 151.5, 164.2, 189.6.</p> <p><b>HRMS</b> (FAB): calc. for C<sub>19</sub>H<sub>21</sub>FO<sub>2</sub>: 300.1526, found: 300.1546 [M]<sup>+</sup>.</p> |
| 5  | (1 <i>S</i> ,7 <i>E</i> ,8 <i>aS</i> )-7-benzylidene-1,2,3,4,6,7,8,8 <i>a</i> -octahydro-5,8 <i>a</i> -dimethyl-6-methylene-naphthalene-1-ol                   |           | 1<br>2<br>3<br>4 | <p><b>Yield:</b> 39 %</p> <p><math>[\alpha]_D^{20} = +29^\circ</math> (c = 1.01, CHCl<sub>3</sub>)</p> <p><b><sup>1</sup>H-NMR</b> (400 MHz, CDCl<sub>3</sub>): δ 1.20 (s, 3H), 1.16-2.16 (m, 8H), 1.68 (s, 3H), 2.78 (brs, 1H), 3.28-3.35 (m, 1H), 5.09 (s, 1H), 5.34 (s, 1H), 6.31 (s, 1H), 7.06-7.38 (m, 5H).</p> <p><b>HRMS</b> (FAB): calc. for C<sub>20</sub>H<sub>24</sub>O: 280.1827, found: 281.1891 [M+H]<sup>+</sup>.</p>                                                                                                                                                                                                                        |
