# Supplementary material
Source: PubMed Central journal article supplement (PMC1297657)

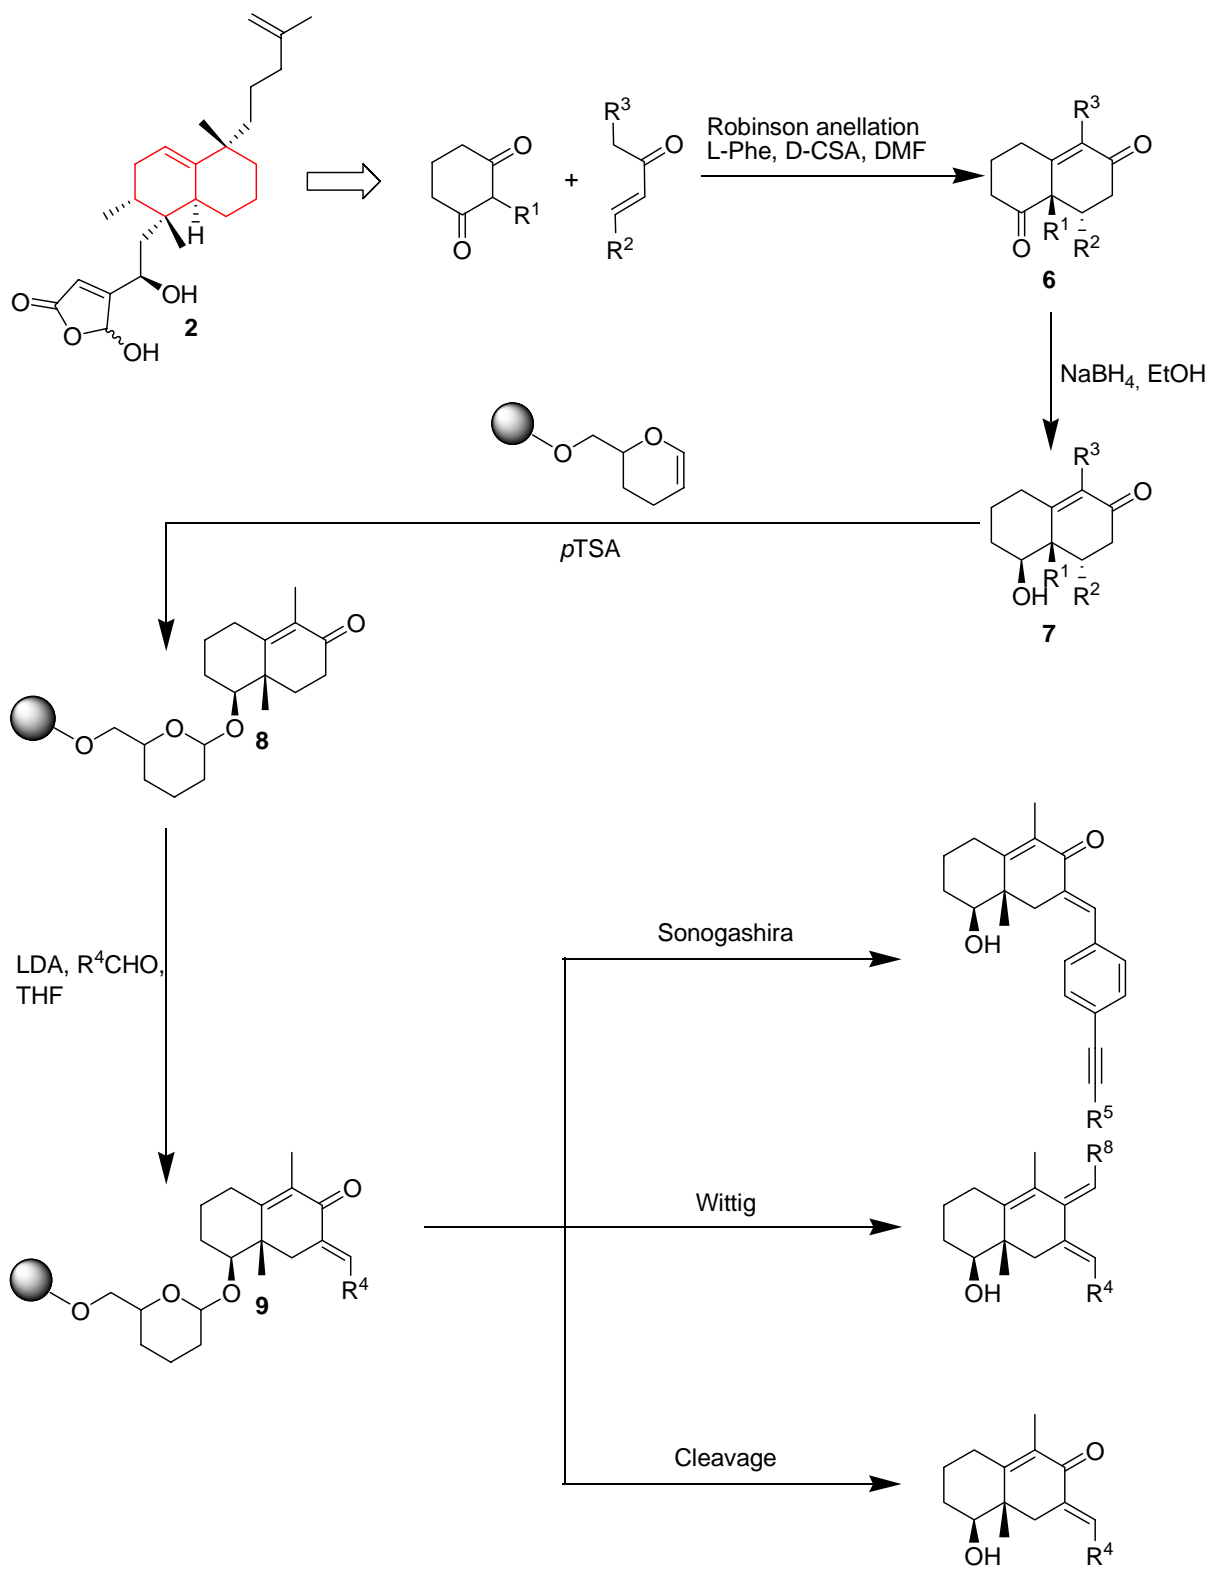

Supplement: pnas_0503647102_3.pdf [file pnas_0503647102_3.pdf]
